# Supplementary material for: Altered DNA methylation associated with a translocation linked to major mental illness
Source: PubMed Central journal article supplement (PMC5859082; doi:10.1038/s41537-018-0047-7), 2018-03-19
Supplement: 41537_2018_47_MOESM1_ESM.pdf [file 41537_2018_47_MOESM1_ESM.pdf]

|                      | <i>Mean Age</i> | <i>p - value</i> |
|----------------------|-----------------|------------------|
| t(1;11) Carriers     | 49              | 0.045            |
| t(1;11) Non-carriers | 37              |                  |

**Supplementary Table 1** Comparison of ages between t(1;11) carriers and non-carriers

Shown are the mean ages of t(1;11) carriers and non-carriers, and unpaired t-test *p*-value comparing between-group age.

|                      | <i>Males</i> | <i>Females</i> | <i>p-value</i> |
|----------------------|--------------|----------------|----------------|
| t(1;11) Carriers     | 8            | 9              | 1              |
| t(1;11) Non-carriers | 12           | 12             |                |

**Supplementary Table 2** Comparison of gender between t(1;11) carriers and non-carriers

Shown are the counts for male and females amongst t(1;11) carriers and non-carriers, and Fisher's exact *p*-value.

|                                         | <i>CD8<sup>+</sup><br/>T-Cells</i> | <i>CD4<sup>+</sup><br/>T-Cells</i> | <i>Natural<br/>Killer<br/>Cells</i> | <i>B-Cells</i> | <i>Monocytes</i> | <i>Granulocytes</i> |
|-----------------------------------------|------------------------------------|------------------------------------|-------------------------------------|----------------|------------------|---------------------|
| Mean proportion in t(1;11) Carriers     | 0.05                               | 0.15                               | 0.06                                | 0.06           | 0.07             | 0.62                |
| Mean proportion in t(1;11) Non-carriers | 0.05                               | 0.16                               | 0.06                                | 0.05           | 0.07             | 0.62                |
| <i>p- value</i>                         | 0.7                                | 0.58                               | 0.5                                 | 0.41           | 0.85             | 0.87                |

**Supplementary Table 3** Comparison of estimated cellular composition of whole blood between (1;11) carriers and non-carriers

Shown are the mean estimated proportions for blood cell types in t(1;11) carriers and non-carriers, and unpaired t-test *p*-values for each cell type.

| <i>GO Term</i> | <i>Description</i>                                 | <i>Class</i> | <i>Enrichment</i> | <i>p-value</i>          | <i>q-value</i>          |
|----------------|----------------------------------------------------|--------------|-------------------|-------------------------|-------------------------|
| GO:0043005     | neuron projection                                  | Component    | 1.73              | 2.29 X 10 <sup>-9</sup> | 3.72 X 10 <sup>-6</sup> |
| GO:0042995     | cell projection                                    | Component    | 1.44              | 3.63 X 10 <sup>-7</sup> | 0.0003                  |
| GO:0030425     | dendrite                                           | Component    | 1.43              | 2.10 X 10 <sup>-6</sup> | 0.0009                  |
| GO:0009653     | anatomical structure morphogenesis                 | Process      | 1.5               | 6.49 X 10 <sup>-8</sup> | 0.0009                  |
| GO:0097458     | neuron part                                        | Component    | 1.96              | 1.93 X 10 <sup>-6</sup> | 0.001                   |
| GO:0009987     | cellular process                                   | Process      | 1.33              | 5.98 X 10 <sup>-7</sup> | 0.002                   |
| GO:0048562     | embryonic organ morphogenesis                      | Process      | 4.36              | 4.93 X 10 <sup>-7</sup> | 0.0022                  |
| GO:0048856     | anatomical structure development                   | Process      | 1.07              | 4.14 X 10 <sup>-7</sup> | 0.0028                  |
| GO:0048731     | system development                                 | Process      | 1.72              | 1.04 X 10 <sup>-6</sup> | 0.0028                  |
| GO:0030424     | axon                                               | Component    | 1.12              | 3.05 X 10 <sup>-5</sup> | 0.0083                  |
| GO:0044444     | cytoplasmic part                                   | Component    | 4.26              | 2.75 X 10 <sup>-5</sup> | 0.0089                  |
| GO:0032502     | developmental process                              | Process      | 1.3               | 6.12 X 10 <sup>-6</sup> | 0.0093                  |
| GO:0010646     | regulation of cell communication                   | Process      | 1.25              | 4.91 X 10 <sup>-6</sup> | 0.0096                  |
| GO:0044763     | single-organism cellular process                   | Process      | 1.1               | 5.69 X 10 <sup>-6</sup> | 0.0097                  |
| GO:0050793     | regulation of developmental process                | Process      | 1.21              | 4.54 X 10 <sup>-6</sup> | 0.01                    |
| GO:0048812     | neuron projection morphogenesis                    | Process      | 2.26              | 8.99 X 10 <sup>-6</sup> | 0.012                   |
| GO:0009887     | organ morphogenesis                                | Process      | 2.15              | 8.55 X 10 <sup>-6</sup> | 0.017                   |
| GO:0051960     | regulation of nervous system development           | Process      | 1.25              | 1.29 X 10 <sup>-5</sup> | 0.014                   |
| GO:0023051     | regulation of signaling                            | Process      | 1.54              | 1.52 X 10 <sup>-5</sup> | 0.014                   |
| GO:0051094     | positive regulation of developmental process       | Process      | 1.41              | 1.43 X 10 <sup>-5</sup> | 0.014                   |
| GO:0048583     | regulation of response to stimulus                 | Process      | 1.25              | 1.24 X 10 <sup>-5</sup> | 0.014                   |
| GO:0050807     | regulation of synapse organisation                 | Process      | 6.99              | 2.31 X 10 <sup>-5</sup> | 0.02                    |
| GO:0044424     | intracellular part                                 | Component    | 1.07              | 8.74 X 10 <sup>-5</sup> | 0.02                    |
| GO:0070588     | calcium ion transmembrane transport                | Process      | 1.21              | 4.33 X 10 <sup>-5</sup> | 0.021                   |
| GO:0051962     | positive regulation of nervous system development  | Process      | 1.93              | 2.97 X 10 <sup>-5</sup> | 0.021                   |
| GO:0044708     | single-organism behavior                           | Process      | 1.68              | 4.57 X 10 <sup>-5</sup> | 0.022                   |
| GO:2000026     | regulation of multicellular organismal development | Process      | 1.38              | 3.19 X 10 <sup>-5</sup> | 0.022                   |
| GO:0045595     | regulation of cell differentiation                 | Process      | 1.56              | 3.52 X 10 <sup>-5</sup> | 0.022                   |
| GO:2001030     | negative regulation of cellular glucuronidation    | Process      | 1.34              | 4.33 X 10 <sup>-5</sup> | 0.022                   |
| GO:0048858     | cell projection morphogenesis                      | Process      | 1.98              | 2.90 X 10 <sup>-5</sup> | 0.022                   |
| GO:0009888     | tissue development                                 | Process      | 1.63              | 3.75 X 10 <sup>-5</sup> | 0.022                   |
| GO:0050767     | regulation of neurogenesis                         | Process      | 25.57             | 3.46 X 10 <sup>-5</sup> | 0.023q                  |
| GO:0031344     | regulation of cell projection organisation         | Process      | 25.57             | 3.98 X 10 <sup>-5</sup> | 0.023                   |

|            |                                                            |           |        |                         |       |
|------------|------------------------------------------------------------|-----------|--------|-------------------------|-------|
| GO:1904224 | negative regulation of glucuronosyltransferase activity    | Process   | 25.57  | 4.33 X 10 <sup>-5</sup> | 0.023 |
| GO:0044767 | single-organism developmental process                      | Process   | 2.35   | 2.87 X 10 <sup>-5</sup> | 0.023 |
| GO:1904223 | regulation of glucuronosyltransferase activity             | Process   | 1.79   | 4.33 X 10 <sup>-5</sup> | 0.024 |
| GO:0021852 | pyramidal neuron migration                                 | Process   | 17,640 | 5.67 X 10 <sup>-5</sup> | 0.026 |
| GO:0051239 | regulation of multicellular organismal process             | Process   | 1.29   | 6.25 X 10 <sup>-5</sup> | 0.028 |
| GO:0032990 | cell part morphogenesis                                    | Process   | 1.84   | 6.46 X 10 <sup>-5</sup> | 0.028 |
| GO:0003197 | endocardial cushion development                            | Process   | 1.45   | 7.97 X 10 <sup>-5</sup> | 0.028 |
| GO:2001029 | regulation of cellular glucuronidation                     | Process   | 2.01   | 7.94 X 10 <sup>-5</sup> | 0.029 |
| GO:0045597 | positive regulation of cell differentiation                | Process   | 1.75   | 7.08 X 10 <sup>-5</sup> | 0.029 |
| GO:0052697 | xenobiotic glucuronidation                                 | Process   | 46.22  | 7.94 X 10 <sup>-5</sup> | 0.029 |
| GO:2000467 | positive regulation of glycogen (starch) synthase activity | Process   | 22.72  | 7.90 X 10 <sup>-5</sup> | 0.03  |
| GO:0046578 | regulation of Ras protein signal transduction              | Process   | 22.72  | 7.55 X 10 <sup>-5</sup> | 0.03  |
| GO:0048598 | embryonic morphogenesis                                    | Process   | 21.83  | 7.86 X 10 <sup>-5</sup> | 0.031 |
| GO:0051240 | positive regulation of multicellular organismal process    | Process   | 1.35   | 9.01 X 10 <sup>-5</sup> | 0.031 |
| GO:0048513 | organ development                                          | Process   | 1.43   | 0.0001                  | 0.034 |
| GO:0034702 | ion channel complex                                        | Component | 1.81   | 0.0002                  | 0.035 |
| GO:0072300 | positive regulation of metanephric glomerulus development  | Process   | 213.82 | 0.0001                  | 0.037 |
| GO:0005783 | endoplasmic reticulum                                      | Component | 5.76   | 0.0003                  | 0.041 |
| GO:0005768 | endosome                                                   | Component | 1.64   | 0.0003                  | 0.042 |
| GO:0014069 | postsynaptic density                                       | Component | 35.18  | 0.0003                  | 0.043 |
| GO:0048167 | regulation of synaptic plasticity                          | Process   | 1.79   | 0.0001                  | 0.044 |
| GO:0044699 | single-organism process                                    | Process   | 1.07   | 0.0001                  | 0.044 |
| GO:0044216 | other organism cell                                        | Component | 5.29   | 0.0003                  | 0.044 |
| GO:0044297 | cell body                                                  | Component | 1.43   | 0.0002                  | 0.045 |
| GO:0050804 | modulation of synaptic transmission                        | Process   | 2.5    | 0.0001                  | 0.045 |
| GO:0043524 | negative regulation of neuron apoptotic process            | Process   | 2.63   | 0.0002                  | 0.046 |
| GO:0033387 | putrescine biosynthetic process from ornithine             | Process   | 22.88  | 0.0002                  | 0.047 |
| GO:0031225 | anchored component of membrane                             | Component | 1.38   | 0.0004                  | 0.048 |
| GO:0044463 | cell projection part                                       | Component | 4.34   | 0.0004                  | 0.049 |

**Supplementary Table 4** Summary of GO terms enriched amongst differentially methylated genes in t(1;11) carriers

For each GO term, Supplementary Table summarises the GO identifier, the GO description, the GO class, enrichment, the enrichment p-values, and enrichment FDR q-values for genes showing the most differential methylation in t(1,11) carriers compared to non-carriers. Enrichment is defined as  $(b/n) / (B/N)$ , where  $b$  = the number of genes at the top of the p-value ranked list that is associated with a given GO term,  $n$  = the number of genes at the top of the p-value-ranked gene list,  $B$  = the total number of genes associated with a given GO term, and  $N$  = the total number of genes.

| Gene(s)              | Feature(s)             | Region                    | Probes | DMR <i>p</i> -value      |
|----------------------|------------------------|---------------------------|--------|--------------------------|
| <i>TNXB</i>          | Body                   | Chr6:32063516-32065113    | 51     | 2.46 x 10 <sup>-13</sup> |
| NA                   | IGR                    | Chr3:196704439-196707088  | 5      | 7.89 x 10 <sup>-10</sup> |
| <i>C11orf75</i>      | TSS1500                | Chr11:93277097-93277255   | 3      | 1.67 x 10 <sup>-9</sup>  |
| NA; <i>PRRT1</i>     | IGR, 3'UTR             | Chr6:32115866-32116728    | 14     | 2.60 x 10 <sup>-9</sup>  |
| <i>RNF5P1;AGPAT1</i> | TSS1500, TSS200        | Chr6:32145233-32145902    | 20     | 6.26 x 10 <sup>-9</sup>  |
| <i>GABRG1</i>        | TSS1500, TSS200, 5'UTR | Chr4:46125801-46126455    | 7      | 7.27 x 10 <sup>-9</sup>  |
| <i>KRTAP5-9</i>      | TSS1500, TSS200, 5'UTR | Chr11:71259142-71259846   | 5      | 3.17 x 10 <sup>-8</sup>  |
| <i>CYP2E1</i>        | Body                   | Chr10:135343047-135343426 | 3      | 5.93 x 10 <sup>-8</sup>  |
| <i>XRR1</i>          | TSS200                 | Chr11:74660246-74660274   | 4      | 6.07 x 10 <sup>-8</sup>  |
| <i>RHOD</i>          | 3'UTR                  | Chr11:66839183-66839543   | 3      | 8.99 x 10 <sup>-8</sup>  |
| <i>TUBGCP5</i>       | TSS1500, TSS200        | Chr15:22833108-22833236   | 3      | 1.58 x 10 <sup>-7</sup>  |
| <i>TRAK1</i>         | TSS1500, Body, 1stExon | Chr3:42201087-42202130    | 6      | 1.64 x 10 <sup>-7</sup>  |
| <i>PSMB8</i>         | 3'UTR, Body            | Chr6:32807898-32810304    | 22     | 3.32 x 10 <sup>-7</sup>  |
| NA                   | IGR                    | Chr1:209526301-209528771  | 3      | 3.46 x 10 <sup>-7</sup>  |
| NA                   | IGR                    | Chr6:159359910-159360236  | 3      | 1.48 x 10 <sup>-6</sup>  |
| <i>RTKN</i>          | TSS1500                | Chr2:74669347-74669415    | 4      | 1.94 x 10 <sup>-6</sup>  |
| NA; <i>KLHL30</i>    | IGR, TSS1500, TSS200   | Chr2:239043942-239047460  | 9      | 2.67 x 10 <sup>-6</sup>  |
| <i>PCSK6</i>         | Body                   | Chr15:101991031-101992367 | 5      | 2.8 x 10 <sup>-6</sup>   |
| <i>MIR663</i>        | TSS1500                | Chr20:26190290-26190418   | 3      | 3.66 x 10 <sup>-6</sup>  |
| <i>ZNF385D</i>       | Body, 1stExon          | Chr3:21791767-21792729    | 4      | 3.82 x 10 <sup>-6</sup>  |
| <i>TNF</i>           | 1stExon                | Chr6:31543557-31543767    | 6      | 4.05 x 10 <sup>-6</sup>  |
| <i>BNIP3</i>         | Body                   | Chr10:133793398-133793556 | 3      | 9.21 x 10 <sup>-6</sup>  |
| <i>TMEM131</i>       | Body                   | Chr2:98377310-98378420    | 3      | 9.58 x 10 <sup>-6</sup>  |
| <i>LTA</i>           | TSS200, 5'UTR, 1stExon | Chr6:31540040-31540705    | 11     | 9.59 x 10 <sup>-6</sup>  |
| NA                   | IGR                    | Chr17:41380728-41383399   | 5      | 9.98 x 10 <sup>-6</sup>  |
| <i>MIXL1</i>         | TSS1500                | Chr1:226411005-226411085  | 4      | 1.06 x 10 <sup>-5</sup>  |
| <i>C17orf98</i>      | Body, 1stExon          | Chr17:36997274-36997566   | 3      | 1.3 x 10 <sup>-5</sup>   |
| <i>FAM83A</i>        | Body                   | Chr8:124217614-124217906  | 3      | 1.42 x 10 <sup>-5</sup>  |
| <i>SPI40</i>         | TSS200, 5'UTR, Body    | Chr2:231090159-231091121  | 5      | 1.56 x 10 <sup>-5</sup>  |
| <i>MEST</i>          | 5'UTR                  | Chr7:130131819-130131937  | 8      | 3 x 10 <sup>-5</sup>     |
| <i>MOV10L1</i>       | TSS200, Body           | Chr22:50584735-50585710   | 7      | 3.02 x 10 <sup>-5</sup>  |
| NA                   | IGR                    | Chr5:101117938-101120956  | 5      | 3.37 x 10 <sup>-5</sup>  |
| NA                   | IGR                    | Chr2:54934730-54938012    | 4      | 3.42 x 10 <sup>-5</sup>  |

|                       |                       |                           |    |                         |
|-----------------------|-----------------------|---------------------------|----|-------------------------|
| <i>LOC399815</i>      | TSS200                | Chr10:124638974-124638992 | 3  | 3.43 x 10 <sup>-5</sup> |
| <i>STX6</i>           | TSS200                | Chr1:180992101-180992126  | 3  | 3.44 x 10 <sup>-5</sup> |
| NA                    | IGR                   | Chr7:156888064-156890971  | 5  | 3.65 x 10 <sup>-5</sup> |
| NA                    | IGR                   | Chr14:54814555-54817362   | 4  | 5.68 x 10 <sup>-5</sup> |
| NA                    | IGR                   | Chr7:73001195-73003686    | 3  | 6.35 x 10 <sup>-5</sup> |
| NA                    | IGR                   | Chr4:77341749-77342075    | 3  | 6.66 x 10 <sup>-5</sup> |
| <i>TDH</i>            | Body                  | Chr8:11203736-11204163    | 4  | 7.48 x 10 <sup>-5</sup> |
| <i>SMYD2</i>          | Body                  | Chr1:214476582-214477761  | 3  | 9.03 x 10 <sup>-5</sup> |
| <i>IGSF9B</i>         | Body                  | Chr11:133820356-133821733 | 4  | 9.05 x 10 <sup>-5</sup> |
| <i>TAP1</i>           | Body                  | Chr6:32819956-32820360    | 7  | 9.06 x 10 <sup>-5</sup> |
| NA                    | IGR                   | Chr1:39281563-39282050    | 4  | 9.11 x 10 <sup>-5</sup> |
| NA                    | IGR                   | Chr10:134898718-134899190 | 3  | 9.24 x 10 <sup>-5</sup> |
| NA                    | IGR                   | Chr11:123939376-123941869 | 3  | 0.0001                  |
| NA                    | IGR                   | Chr1:147799913-147804738  | 9  | 0.0001                  |
| <i>HLA-DPA1</i>       | Body, 3'UTR           | Chr6:33033283-33037541    | 16 | 0.0001                  |
| <i>MIR548N</i>        | Body                  | Chr2:179387372-179388545  | 3  | 0.0001                  |
| <i>LIME1</i>          | Body                  | Chr20:62369366-62369583   | 3  | 0.0001                  |
| NA                    | IGR                   | Chr7:1208305-1210932      | 3  | 0.0001                  |
| <i>VSTM1</i>          | TSS200, Body, 1stExon | Chr19:54566357-54567319   | 3  | 0.0001                  |
| NA                    | IGR                   | Chr5:61027075-61030044    | 6  | 0.0001                  |
| <i>ZNF677</i>         | TSS200                | Chr19:53758279-53758315   | 3  | 0.0001                  |
| NA                    | IGR                   | Chr11:8290652-8290978     | 3  | 0.0002                  |
| <i>ACP5</i>           | TSS1500               | Chr19:11689791-11689944   | 5  | 0.0002                  |
| <i>PSKH2</i>          | TSS1500, TSS200       | Chr8:87082001-87082129    | 5  | 0.0002                  |
| <i>ATP8A2</i>         | Body                  | Chr13:26586108-26586400   | 3  | 0.0002                  |
| <i>VAX2</i>           | TSS1500               | Chr2:71126945-71127001    | 3  | 0.0002                  |
| <i>LRP1B</i>          | TSS200                | Chr2:142889366-142889402  | 3  | 0.0003                  |
| <i>C2orf54</i>        | TSS1500               | Chr2:241836300-241836518  | 3  | 0.0003                  |
| <i>KCNIP1; KCNMB1</i> | TSS200, Body          | Chr5:169815897-169816859  | 4  | 0.0003                  |
| NA                    | IGR                   | Chr8:832849-833211        | 4  | 0.0003                  |
| <i>C6orf48</i>        | 5'UTR                 | Chr6:31802972-31803220    | 9  | 0.0004                  |
| <i>NHEDC1</i>         | TSS200, 1stExon       | Chr4:103940811-103940897  | 3  | 0.0004                  |
| <i>HEATR2</i>         | Body, 3'UTR           | Chr7:824351-826059        | 6  | 0.0004                  |
| NA                    | IGR                   | Chr10:115860117-115860473 | 3  | 0.0004                  |

|                         |                |                           |    |        |
|-------------------------|----------------|---------------------------|----|--------|
| <i>OR2L13</i>           | 1stExon        | Chr1:248100542-248100657  | 4  | 0.0005 |
| <i>RPTOR</i>            | Body           | Chr17:78809217-78810354   | 3  | 0.0005 |
| <i>ADARB2</i>           | Body           | Chr10:1452489-1453586     | 3  | 0.0005 |
| <i>KLHL29</i>           | Body           | Chr2:23885619-23886838    | 3  | 0.0005 |
| NA                      | IGR            | Chr6:33870717-33874881    | 16 | 0.0006 |
| <i>C2CD4D</i>           | Body           | Chr1:151810808-151810978  | 4  | 0.0006 |
| <i>KATNAL2</i>          | 5'UTR          | Chr18:44561939-44562173   | 5  | 0.0006 |
| NA                      | IGR            | Chr1:46632418-46632744    | 4  | 0.0007 |
| NA                      | IGR            | Chr1:117316713-117319422  | 6  | 0.0007 |
| <i>RHOV</i>             | Body           | Chr1:228872106-228872264  | 3  | 0.0007 |
| <i>ADAMTS2</i>          | Body           | Chr5:178594504-178594662  | 3  | 0.0007 |
| <i>NFE2L1</i>           | TSS1500        | Chr17:46124661-46124789   | 3  | 0.0007 |
| <i>TBCD</i>             | Body           | Chr17:80759197-80760159   | 3  | 0.0007 |
| <i>RPI</i>              | Body           | Chr8:55533808-55534034    | 4  | 0.0007 |
| <i>DPYSL3</i>           | Body           | Chr5:146832152-146832444  | 5  | 0.0008 |
| <i>DZIP1L</i>           | TSS1500        | Chr3:137834643-137834771  | 3  | 0.0009 |
| NA                      | IGR            | Chr12:29302148-29302314   | 3  | 0.0009 |
| NA                      | IGR            | Chr12:114916775-114919883 | 6  | 0.0010 |
| <i>MSXI</i>             | Body           | Chr4:4864284-4864576      | 6  | 0.0010 |
| NA                      | IGR            | Chr6:32848233-32852184    | 3  | 0.0011 |
| <i>MAPT</i>             | 1stExon        | Chr17:43971863-43971971   | 4  | 0.0011 |
| <i>ERMAP</i>            | 5'UTR, Body    | Chr1:43295986-43296972    | 4  | 0.0012 |
| <i>TRIM10</i>           | 3'UTR, Body    | Chr6:30118914-30123074    | 24 | 0.0012 |
| NA; <i>RPRM</i>         | IGR, 3'UTR     | Chr2:15433734-154334094   | 5  | 0.0013 |
| NA                      | IGR            | Chr1:160950485-160953893  | 5  | 0.0013 |
| NA                      | IGR            | Chr10:133528532-133530912 | 4  | 0.0016 |
| <i>HOXC11</i>           | 3'UTR          | Chr12:54369487-54373005   | 6  | 0.0017 |
| <i>TSPAN19;LRR1Q1</i>   | TSS200, 5'UTR  | Chr12:85430071-85430601   | 8  | 0.0018 |
| <i>TRIM15</i>           | 3'UTR          | Chr6:30140125-30140546    | 8  | 0.0019 |
| <i>PRICKLE1</i>         | Body, 3'UTR    | Chr12:42850912-42854914   | 7  | 0.0019 |
| <i>STAT3</i>            | Body           | Chr17:40489088-40490266   | 5  | 0.0021 |
| NA; <i>COX19</i>        | IGR, 3'UTR     | Chr7:1001886-1005509      | 9  | 0.0022 |
| NA                      | IGR            | Chr8:53325115-53327858    | 8  | 0.0023 |
| <i>SI00A13; SI00A14</i> | TSS1500, 3'UTR | Chr1:153589312-153593314  | 5  | 0.0036 |

|                 |                                          |                           |    |        |
|-----------------|------------------------------------------|---------------------------|----|--------|
| <i>MICB</i>     | Body                                     | Chr6:31466095-31466266    | 4  | 0.0039 |
| NA              | IGR                                      | Chr6:30094973-30095632    | 25 | 0.0040 |
| <i>SLC6A12</i>  | TSS200, 5'UTR                            | Chr12:322249-322914       | 9  | 0.0044 |
| <i>TNXB</i>     | Body                                     | Chr6:32054900-32055225    | 8  | 0.0063 |
| NA              | IGR                                      | Chr5:3102528-3106063      | 4  | 0.0064 |
| <i>TMCO3</i>    | Body                                     | Chr13:114192835-114194543 | 11 | 0.0064 |
| <i>ASCL2</i>    | TSS1500                                  | Chr11:2293053-2293275     | 9  | 0.0064 |
| <i>VARS2</i>    | Body                                     | Chr6:30883736-30885444    | 14 | 0.0074 |
| <i>B3GALT4</i>  | 1stExon                                  | Chr6:33245445-33245846    | 20 | 0.0090 |
| <i>NOM1</i>     | Body                                     | Chr7:156755232-156756616  | 6  | 0.0092 |
| <i>ALPL</i>     | 5'UTR                                    | Chr1:21877057-21877844    | 6  | 0.0105 |
| <i>HLA-DPA1</i> | Body                                     | Chr6:33040054-33041250    | 8  | 0.0121 |
| <i>EHMT2</i>    | Body                                     | Chr6:31858853-31861146    | 20 | 0.0124 |
| NA              | IGR                                      | Chr12:131700432-131703053 | 5  | 0.0166 |
| <i>KLC2</i>     | 3'UTR                                    | Chr11:66034892-66035327   | 14 | 0.0169 |
| <i>CNTN4</i>    | Body                                     | Chr3:3079716-3080819      | 4  | 0.0224 |
| <i>GNL1</i>     | 3'UTR                                    | Chr6:30507466-30511643    | 15 | 0.0289 |
| <i>PRDM16</i>   | Body                                     | Chr1:3209038-3210391      | 5  | 0.0380 |
| <i>HCP5</i>     | TSS1500, TSS200, 1stExon,<br>Body, 3'UTR | Chr6:31429311-31433970    | 18 | 0.0392 |
| NA              | IGR                                      | Chr5:170762452-170765146  | 9  | 0.0408 |
| <i>ARHGAP25</i> | TSS1500, 5'UTR, Body                     | Chr2:69001334-69002335    | 10 | 0.0428 |
| <i>HSPAIL</i>   | 5'UTR, Body                              | Chr6:31778918-31782134    | 19 | 0.0498 |

**Supplementary Table 5** Summary of t(1;11)-associated DMRs identified by the probe lasso algorithm

Summary of the genes (if applicable), genomic features, hg19 genomic coordinates, number of probes and FDR-corrected p-value (q-value) associated with each DMR. “NA” in the “Gene” column represents intergenic regions (i.e. regions not annotated to a RefSeq gene). Genomic features are coded “IGR” for intergenic regions, “TSS200” and “TSS1500” for probes occurring within 200 and 1500 of a gene’s transcription start site, respectively; “5’UTR” and “3’UTR” for probes occurring within a gene’s 5’ and 3’ untranslated region, respectively, “1stExon” for probes occurring within the first exon of a gene, and “Body” for probes occurring within the gene body.



|                                                       | <i>t(1;11) Non-carriers</i> | <i>t(1;11) Carriers</i> |
|-------------------------------------------------------|-----------------------------|-------------------------|
| Unaffected                                            | 18                          |                         |
| Recurrent MDD                                         | 2                           | 3                       |
| Single episode MDD                                    | 2                           | 3                       |
| Single episode MDD +<br>generalised anxiety           | 1                           |                         |
| Generalised anxiety                                   | 1                           |                         |
| Conduct disorder (adolescent)                         |                             | 2                       |
| Single episode MDD +<br>Conduct disorder (adolescent) |                             | 1                       |
| Cyclothymia                                           |                             | 3                       |
| Bipolar Disorder I                                    |                             | 2                       |
| Schizophrenia                                         |                             | 2                       |
| Schizoaffective disorder                              |                             | 1                       |

**Supplementary Table 6** Diagnosis counts within each group

Shown is a summary of psychiatric diagnoses in the family and the number of *t(1;11)* carriers and non-carriers with a given diagnosis.
