# Supplementary material for: Altered DNA methylation associated with a translocation linked to major mental illness
Source: PubMed Central journal article supplement (PMC5859082; doi:10.1038/s41537-018-0047-7), 2018-03-19
Supplement: 41537_2018_47_MOESM2_ESM.pdf [file 41537_2018_47_MOESM2_ESM.pdf]

### Chromosome 1 DMRs

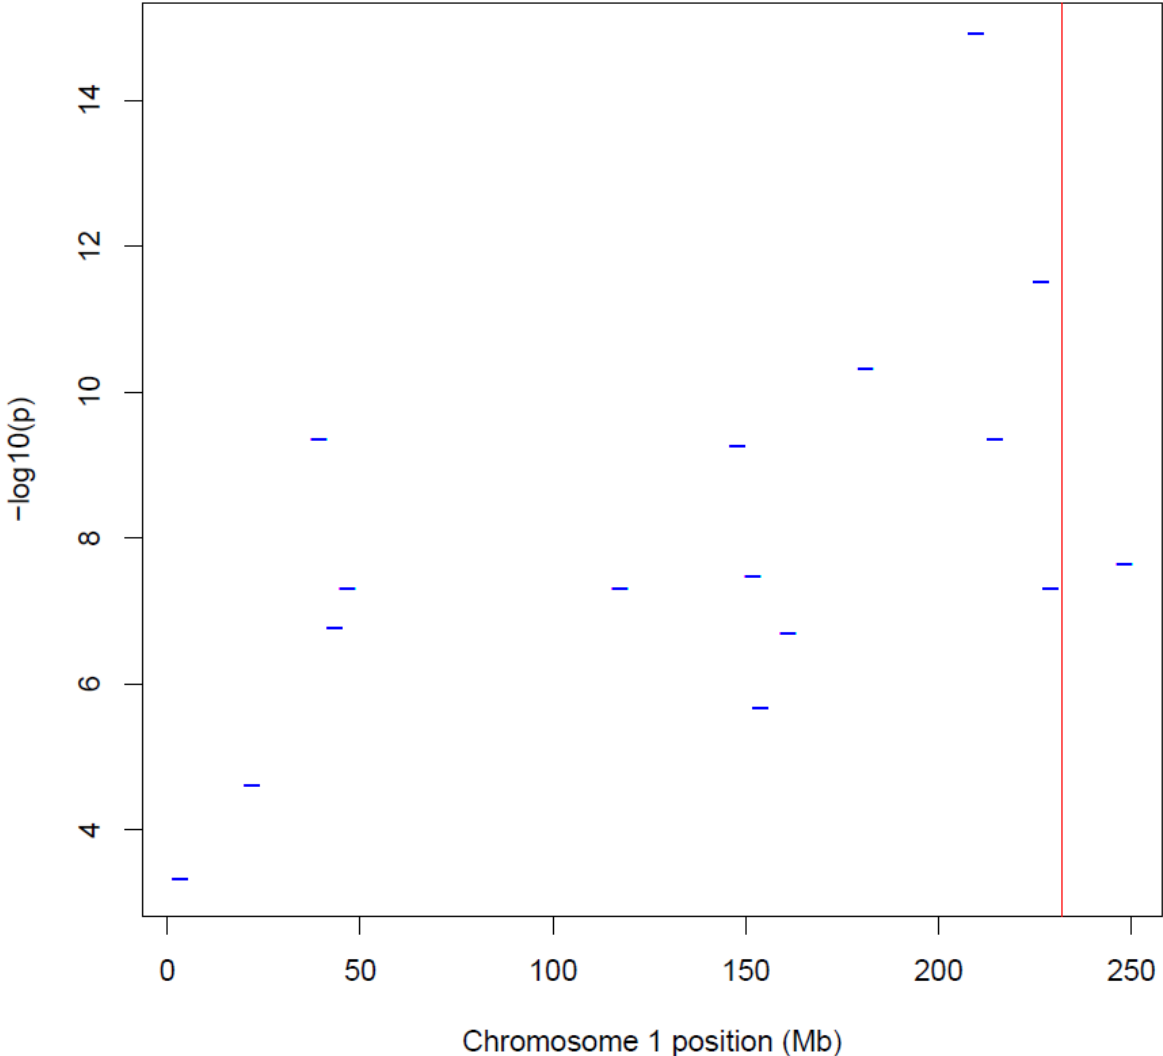

**Supplementary Figure 1** DMRs identified on chromosome 1  
DMRs identified between t(1;11) carriers and non-carriers on chromosome 1. Chromosomal position in megabases (Mb) is shown along the X-axis while  $-\log_{10}$  p-value is shown along the Y-axis. The red vertical line represents the t(1;11) breakpoint on chromosome 1.

### Chromosome 2 DMRs

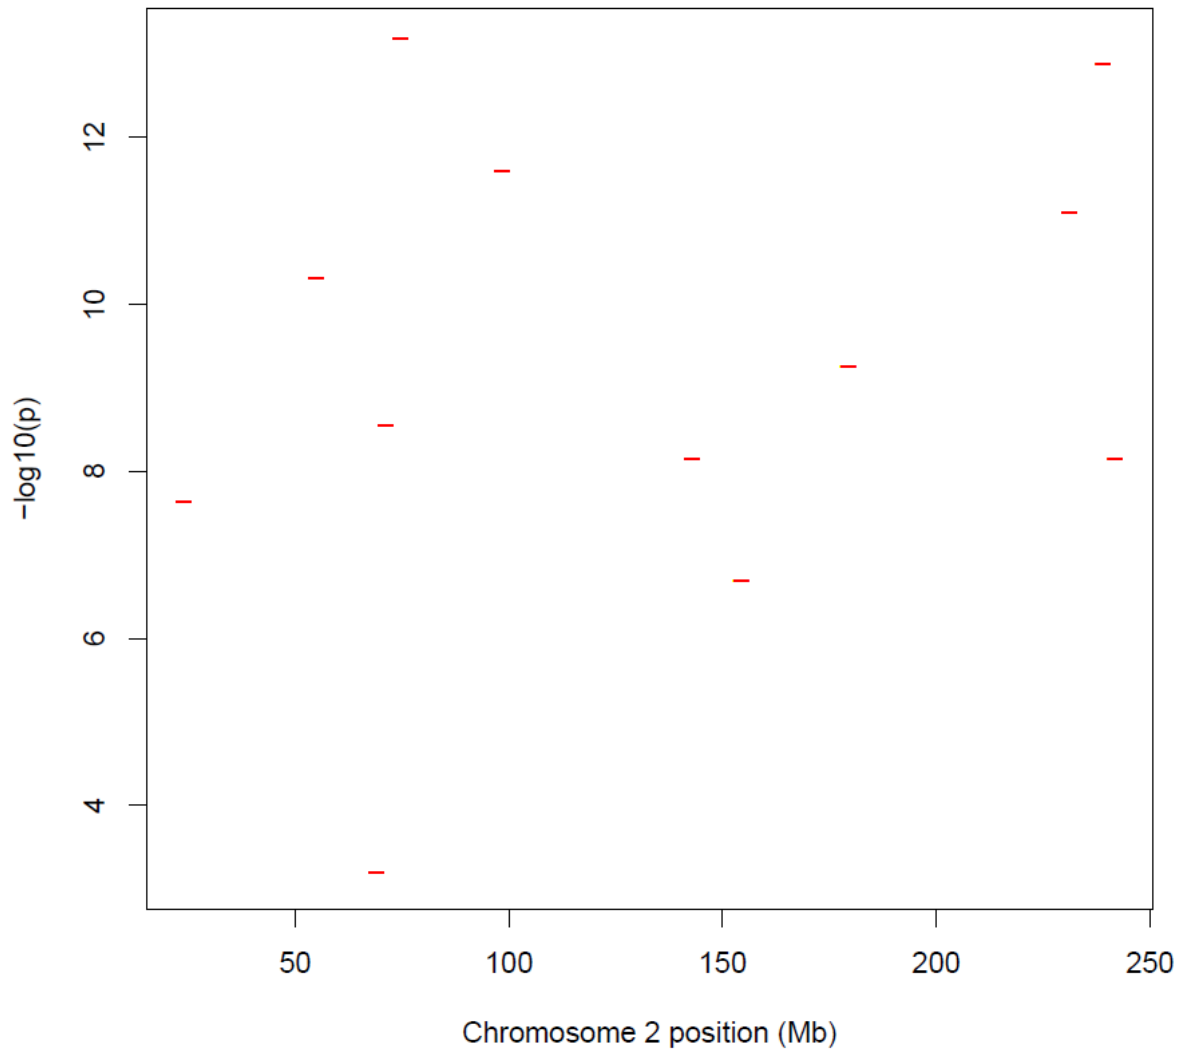

**Supplementary Figure 2** DMRs identified on chromosome 2

DMRs identified between t(1;11) carriers and non-carriers on chromosome 2. Chromosomal position in megabases (Mb) is shown along the X-axis while  $-\log_{10}$  p-value is shown along the Y-axis.

### Chromosome 3 DMRs

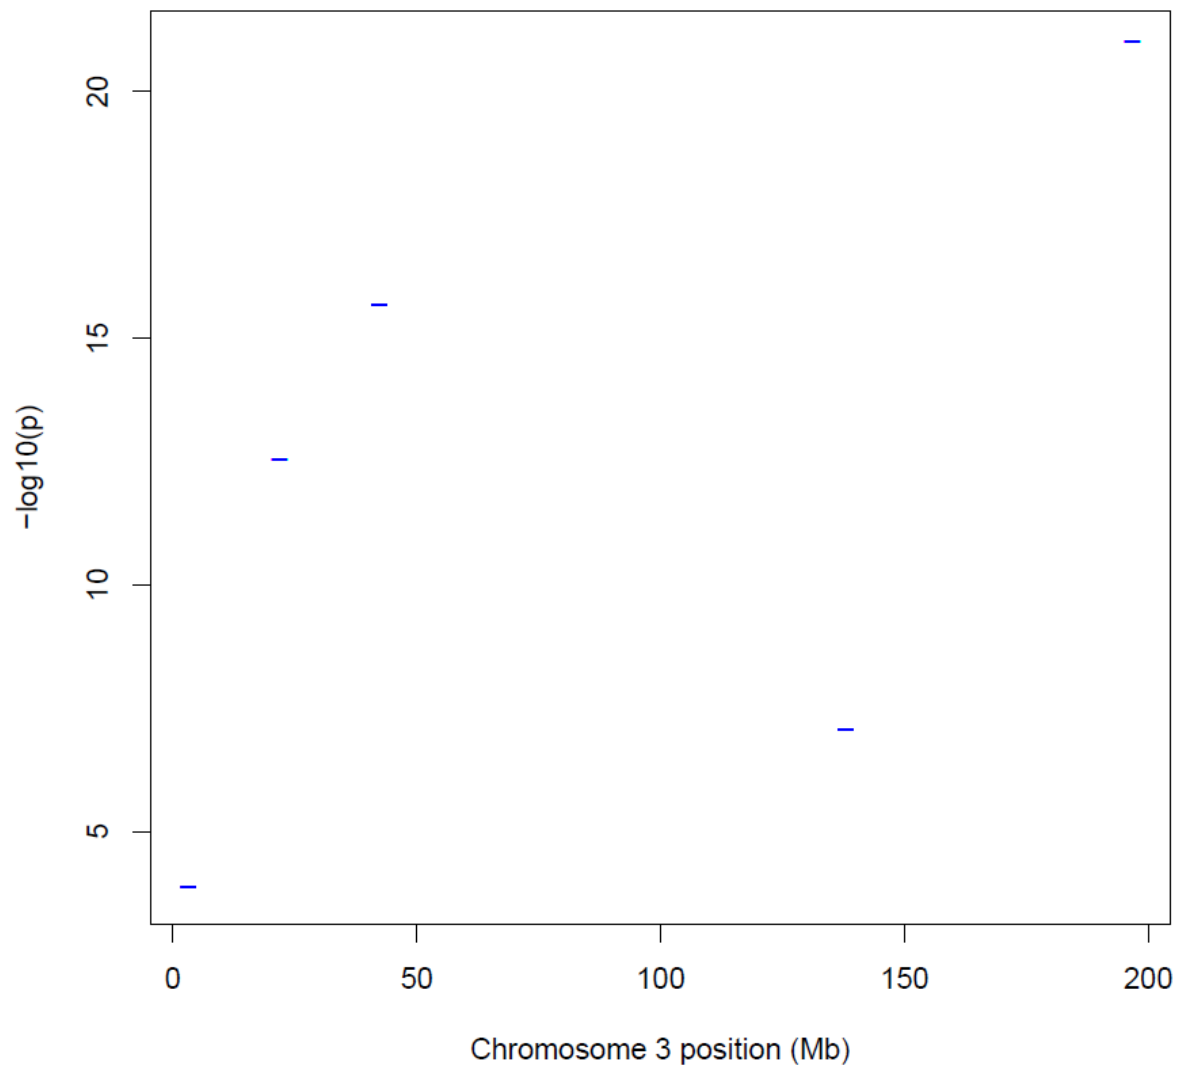

**Supplementary Figure 3** DMRs identified on chromosome 3

DMRs identified between t(1;11) carriers and non-carriers on chromosome 3. Chromosomal position in megabases (Mb) is shown along the X-axis while  $-\log_{10}$  p-value is shown along the Y-axis.

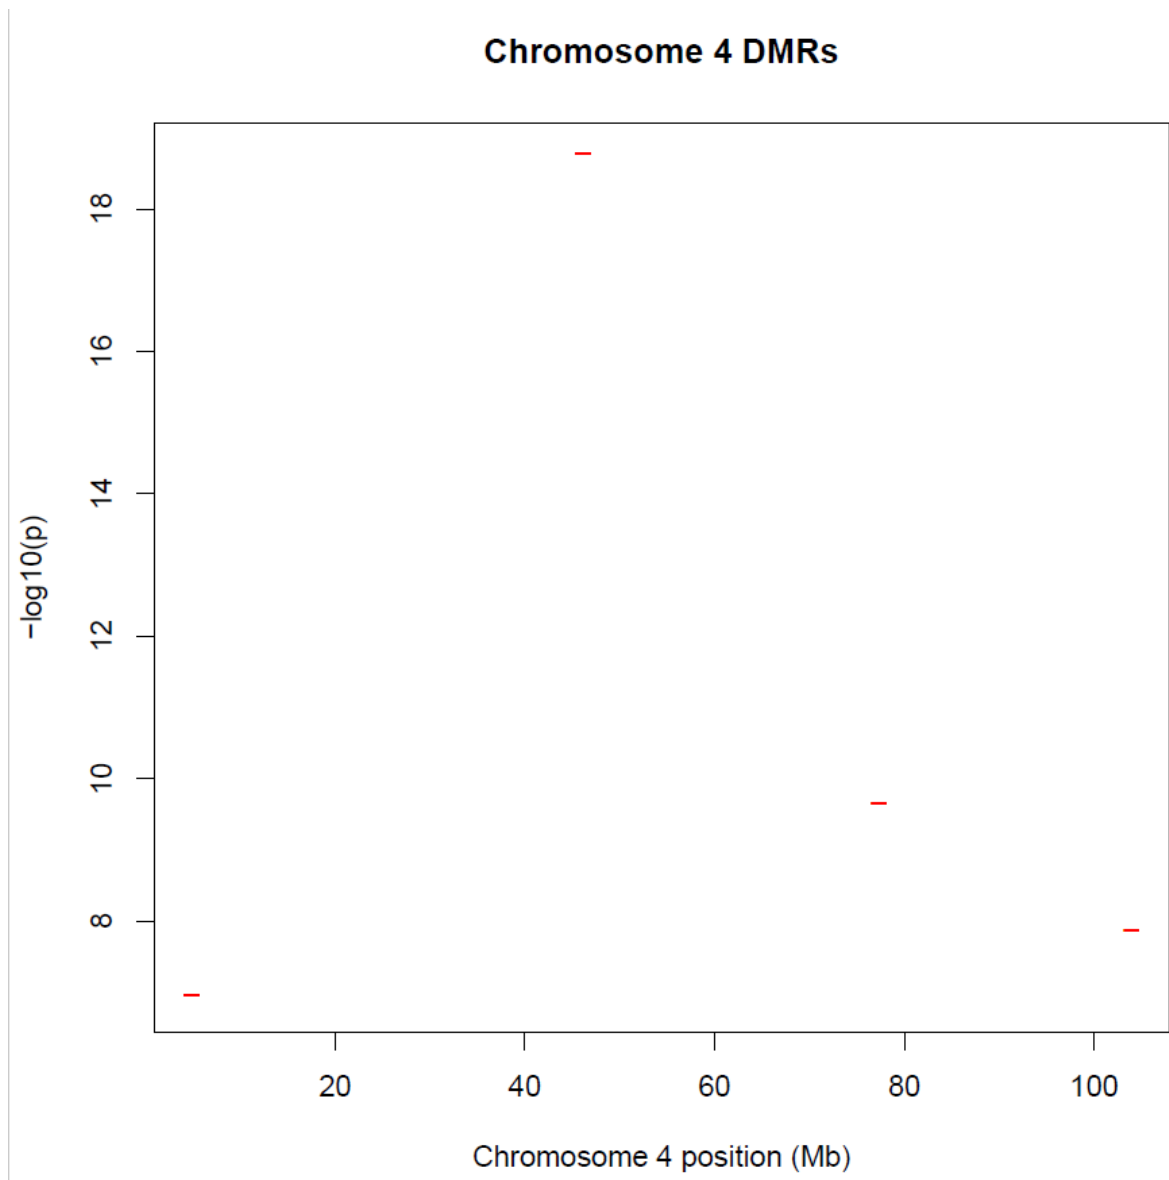

**Supplementary Figure 4** DMRs identified on chromosome 4

DMRs identified between t(1;11) carriers and non-carriers on chromosome 4. Chromosomal position in megabases (Mb) is shown along the X-axis while  $-\log_{10}$  p-value is shown along the Y-axis.

### Chromosome 7 DMRs

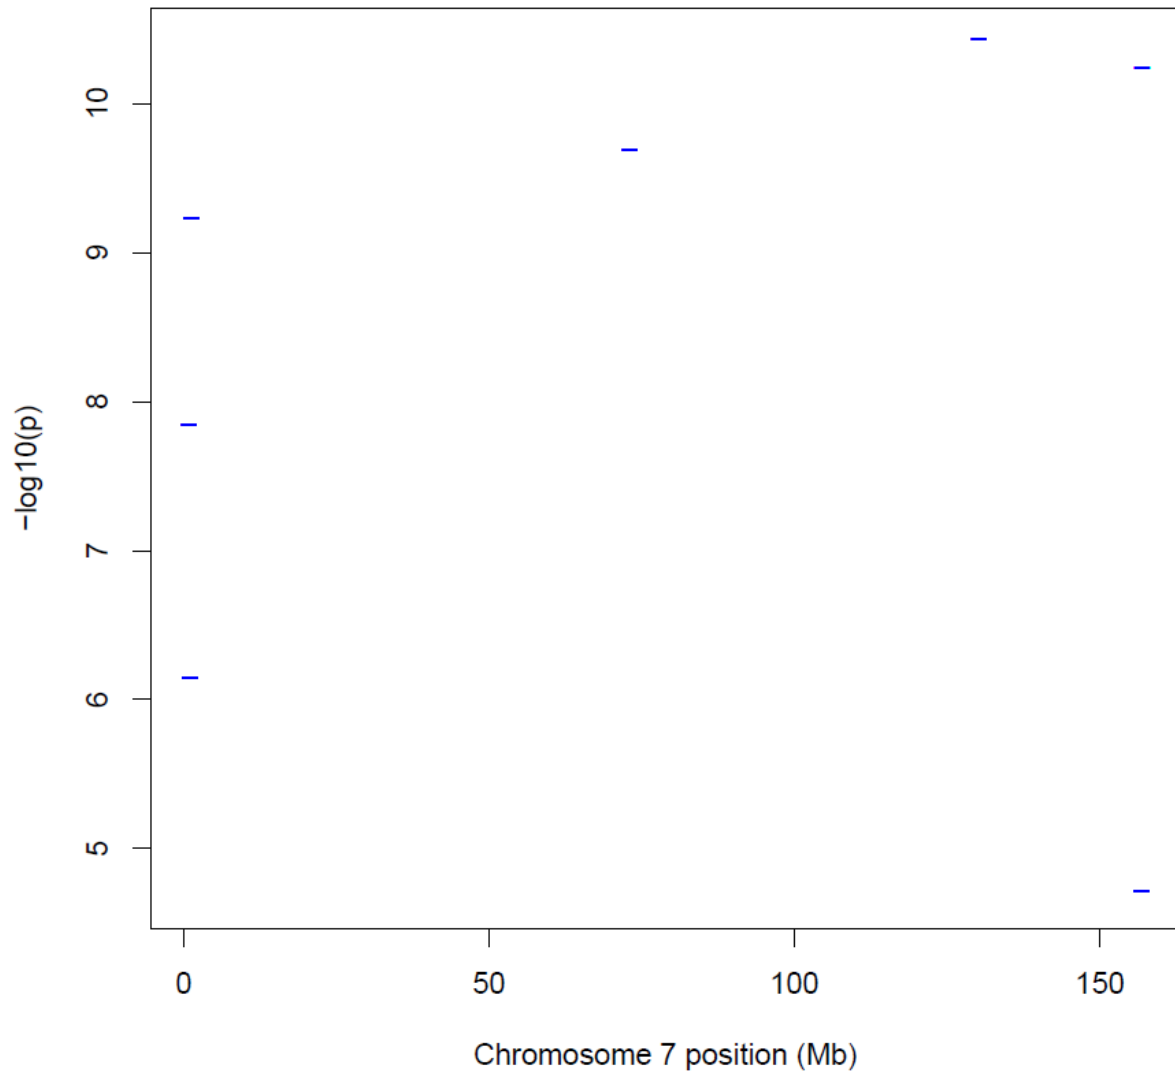

**Supplementary Figure 5** DMRs identified on chromosome 7

DMRs identified between t(1;11) carriers and non-carriers on chromosome 7. Chromosomal position in megabases (Mb) is shown along the X-axis while  $-\log_{10}$  p-value is shown along the Y-axis.

### Chromosome 8 DMRs

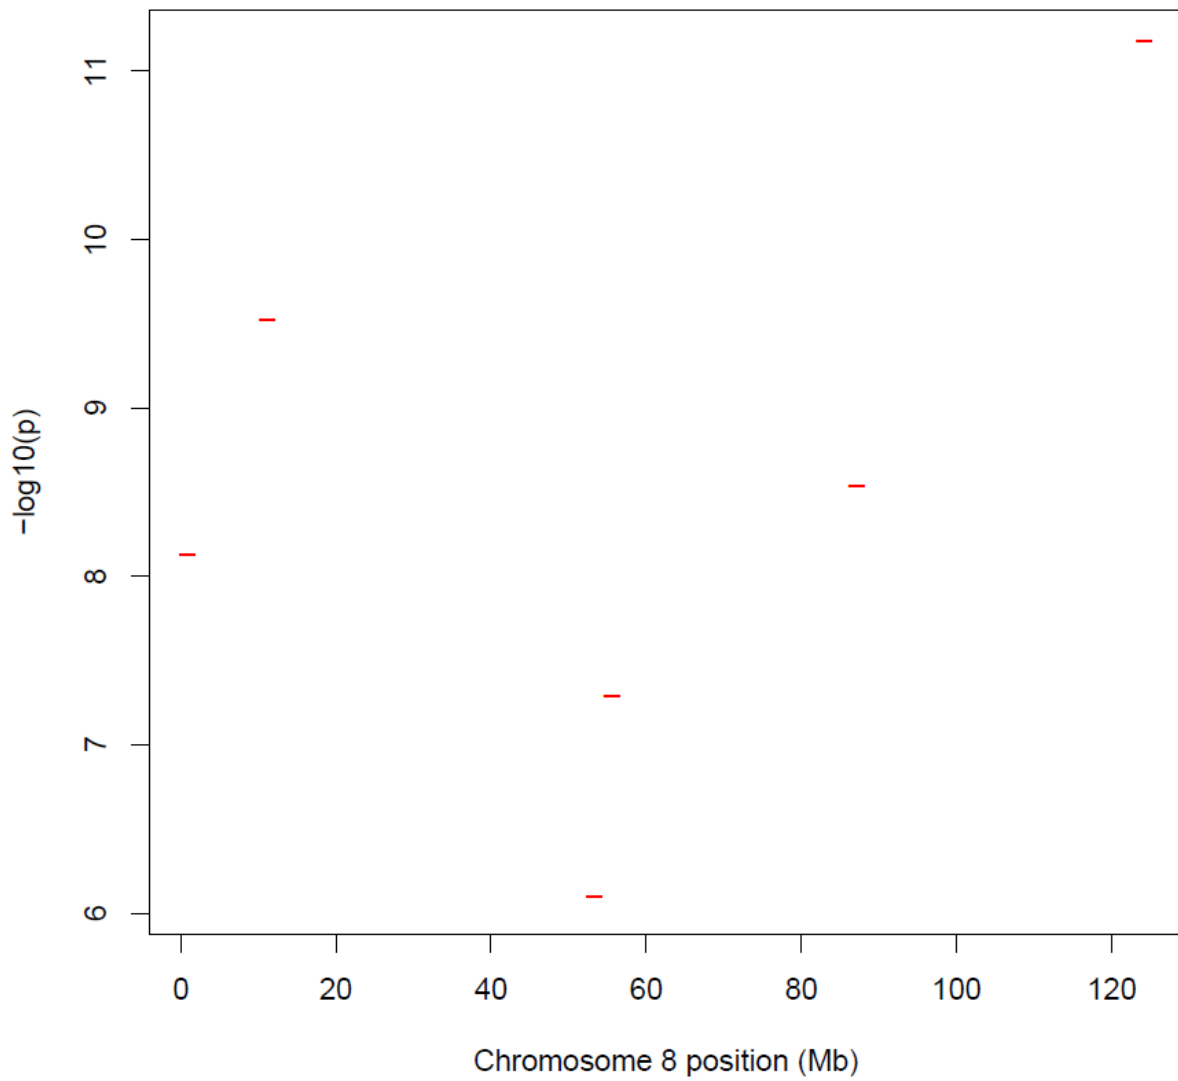

**Supplementary Figure 6** DMRs identified on chromosome 8

DMRs identified between t(1;11) carriers and non-carriers on chromosome 8. Chromosomal position in megabases (Mb) is shown along the X-axis while  $-\log_{10}$  p-value is shown along the Y-axis.

### Chromosome 10 DMRs

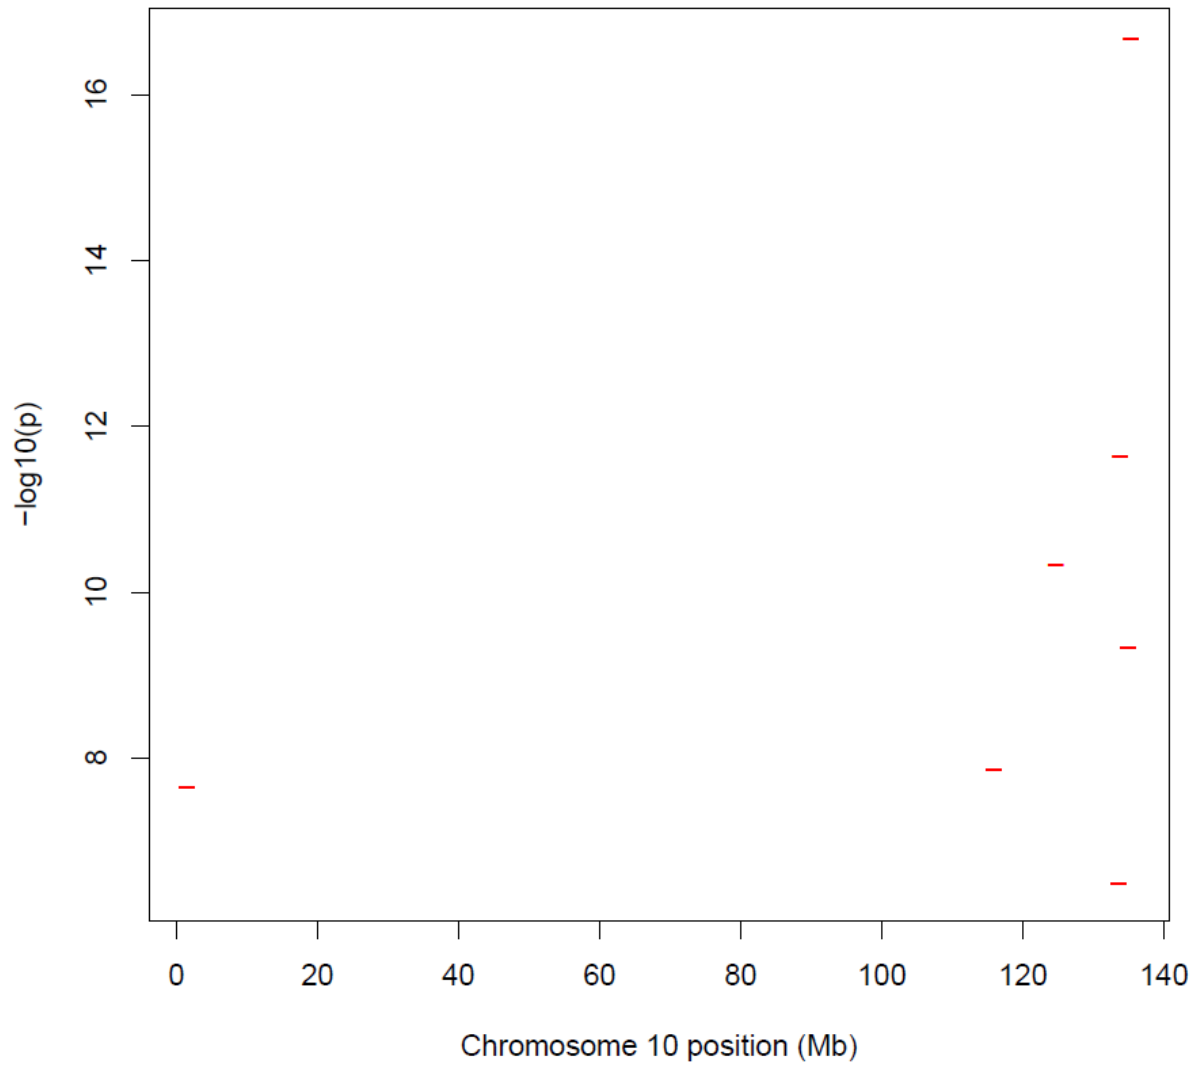

**Supplementary Figure 7** DMRs identified on chromosome 10

DMRs identified between t(1;11) carriers and non-carriers on chromosome 10. Chromosomal position in megabases (Mb) is shown along the X-axis while  $-\log_{10}$  p-value is shown along the Y-axis.

### Chromosome 11 DMRs

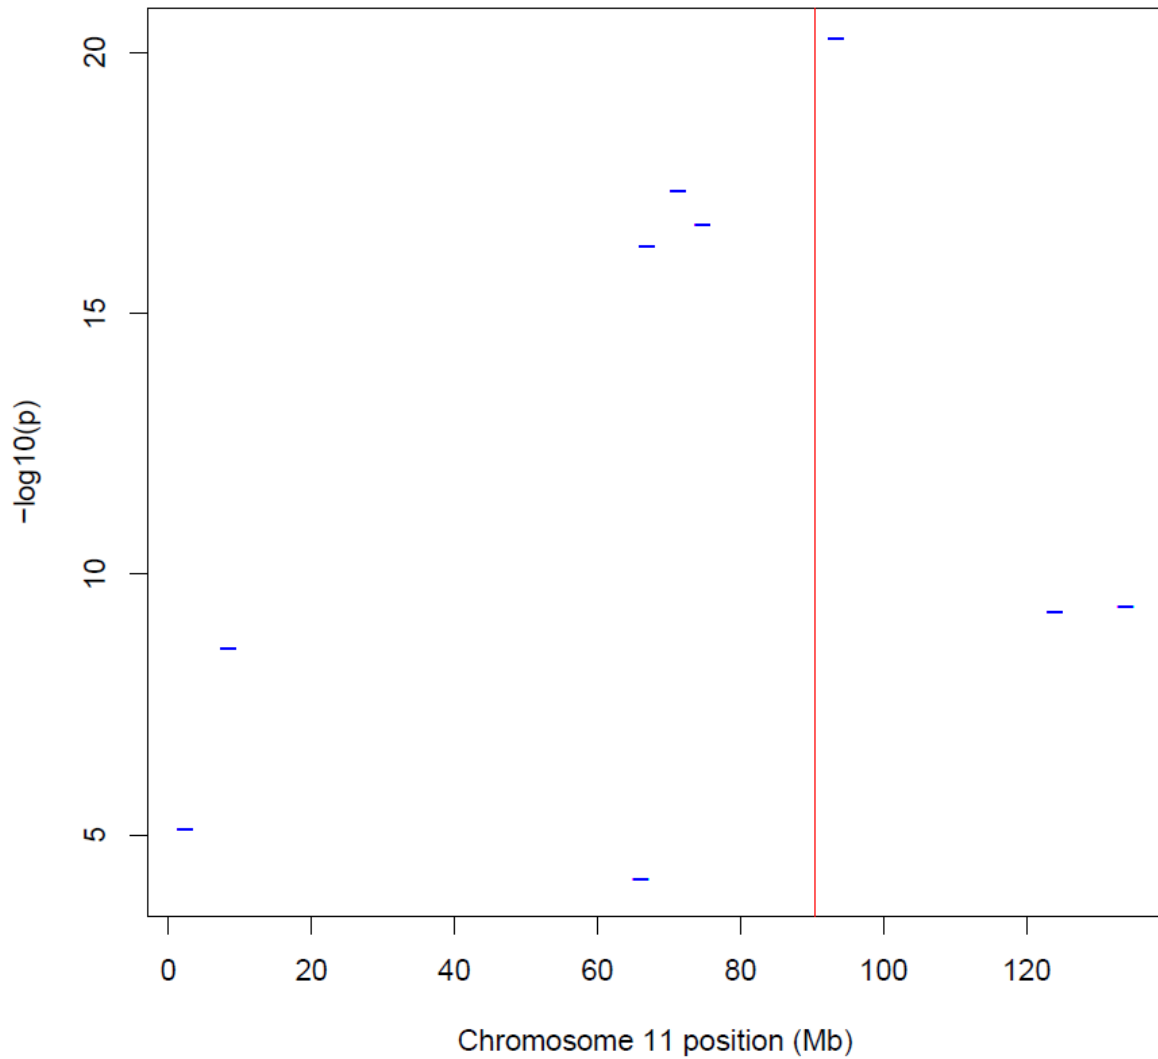

**Supplementary Figure 8** DMRs identified on chromosome 11

DMRs identified between t(1;11) carriers and non-carriers on chromosome 11. Chromosomal position in megabases (Mb) is shown along the X-axis while  $-\log_{10}$  p-value is shown along the Y-axis. The red vertical line represents the t(1;11) breakpoint on chromosome 11.



### Chromosome 12 DMRs

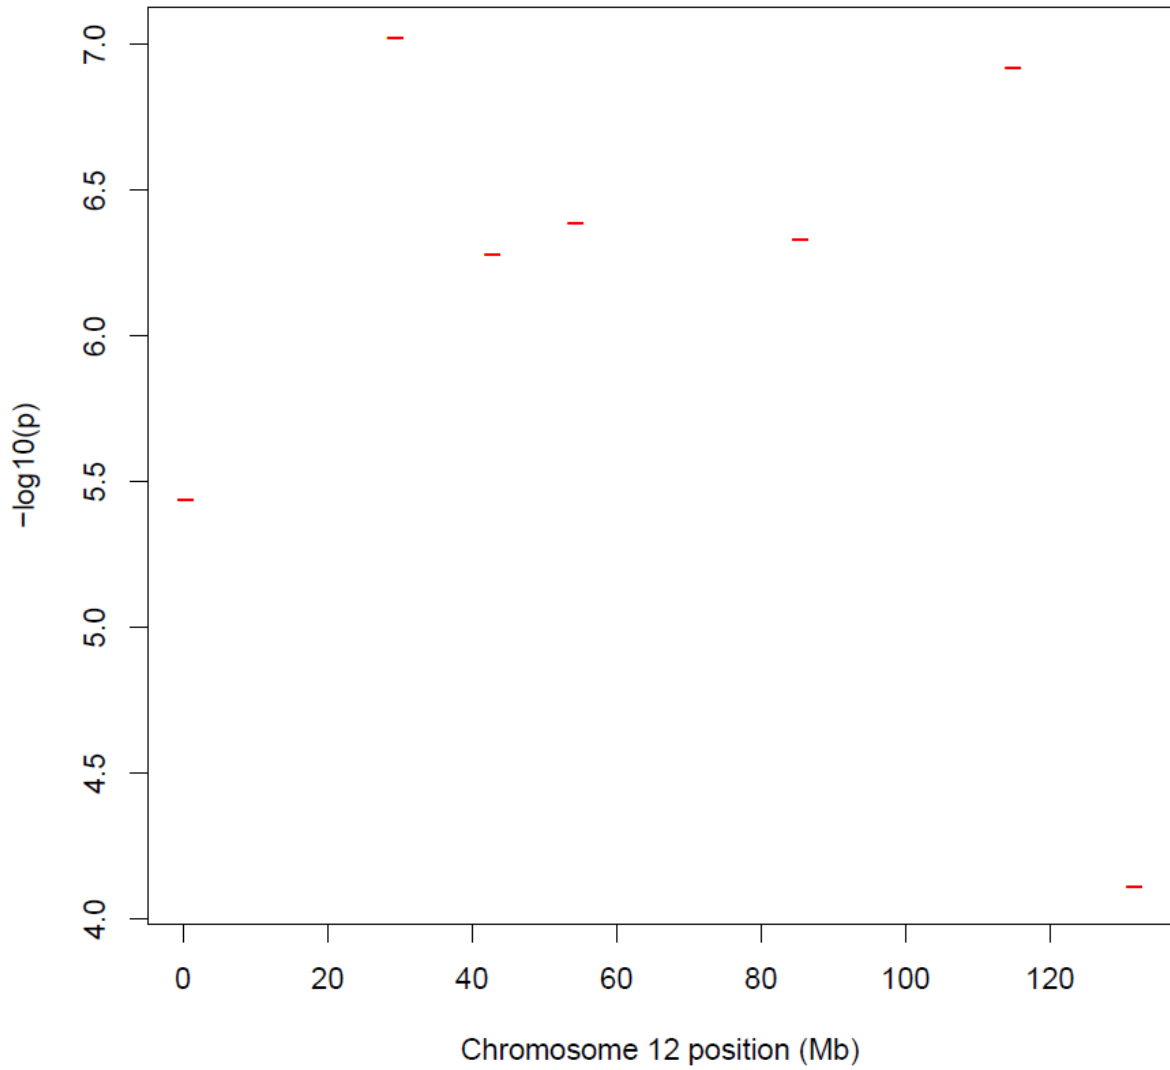

**Supplementary Figure 9** DMRs identified on chromosome 12

DMRs identified between t(1;11) carriers and non-carriers on chromosome 12. Chromosomal position in megabases (Mb) is shown along the X-axis while  $-\log_{10}$  p-value is shown along the Y-axis.

### Chromosome 13 DMRs

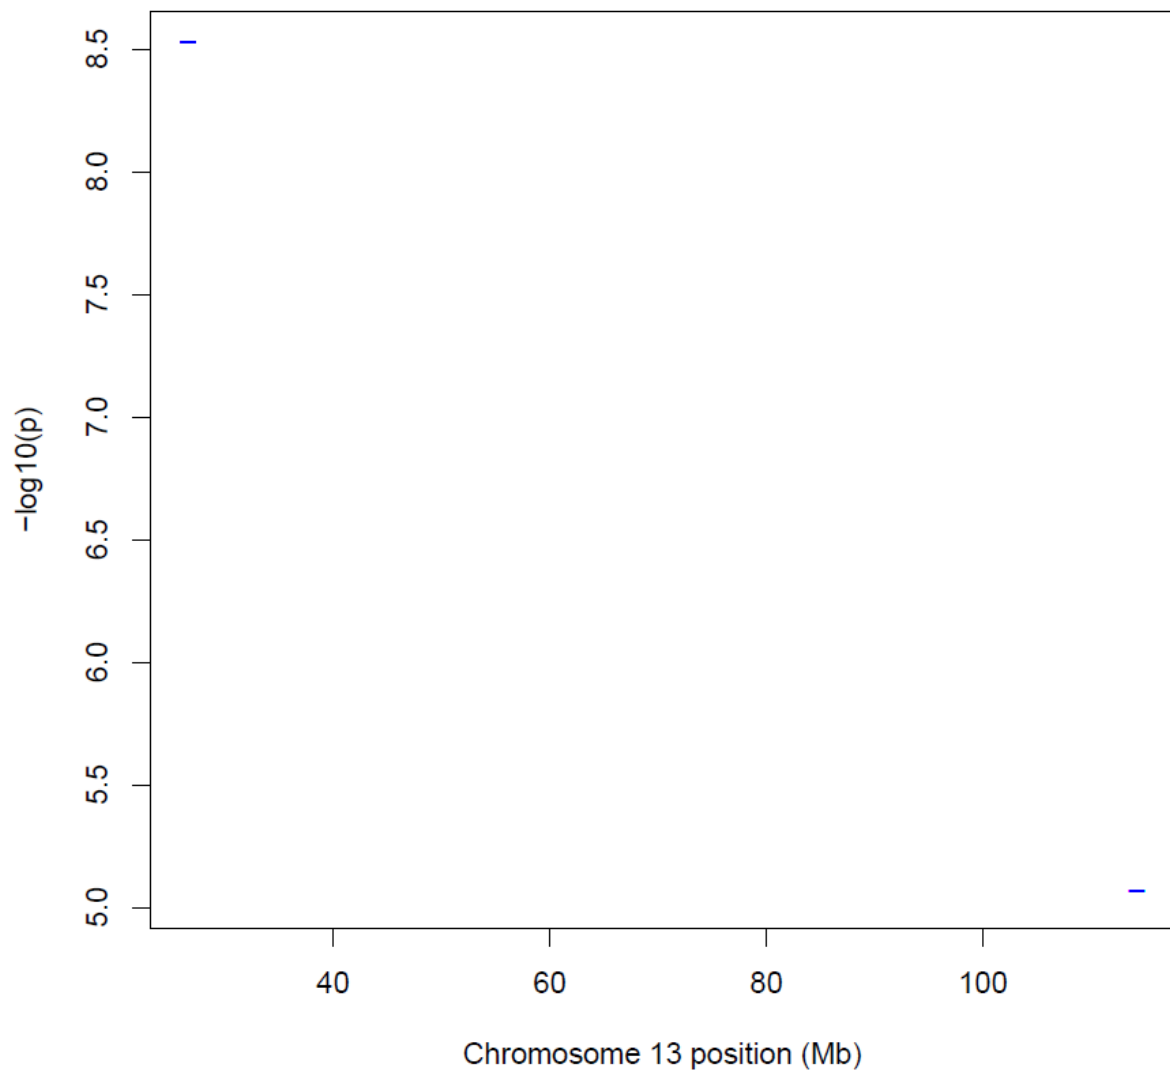

**Supplementary Figure 10** DMRs identified on chromosome 13

DMRs identified between t(1;11) carriers and non-carriers on chromosome 13. Chromosomal position in megabases (Mb) is shown along the X-axis while  $-\log_{10}$  p-value is shown along the Y-axis.

### Chromosome 14 DMRs

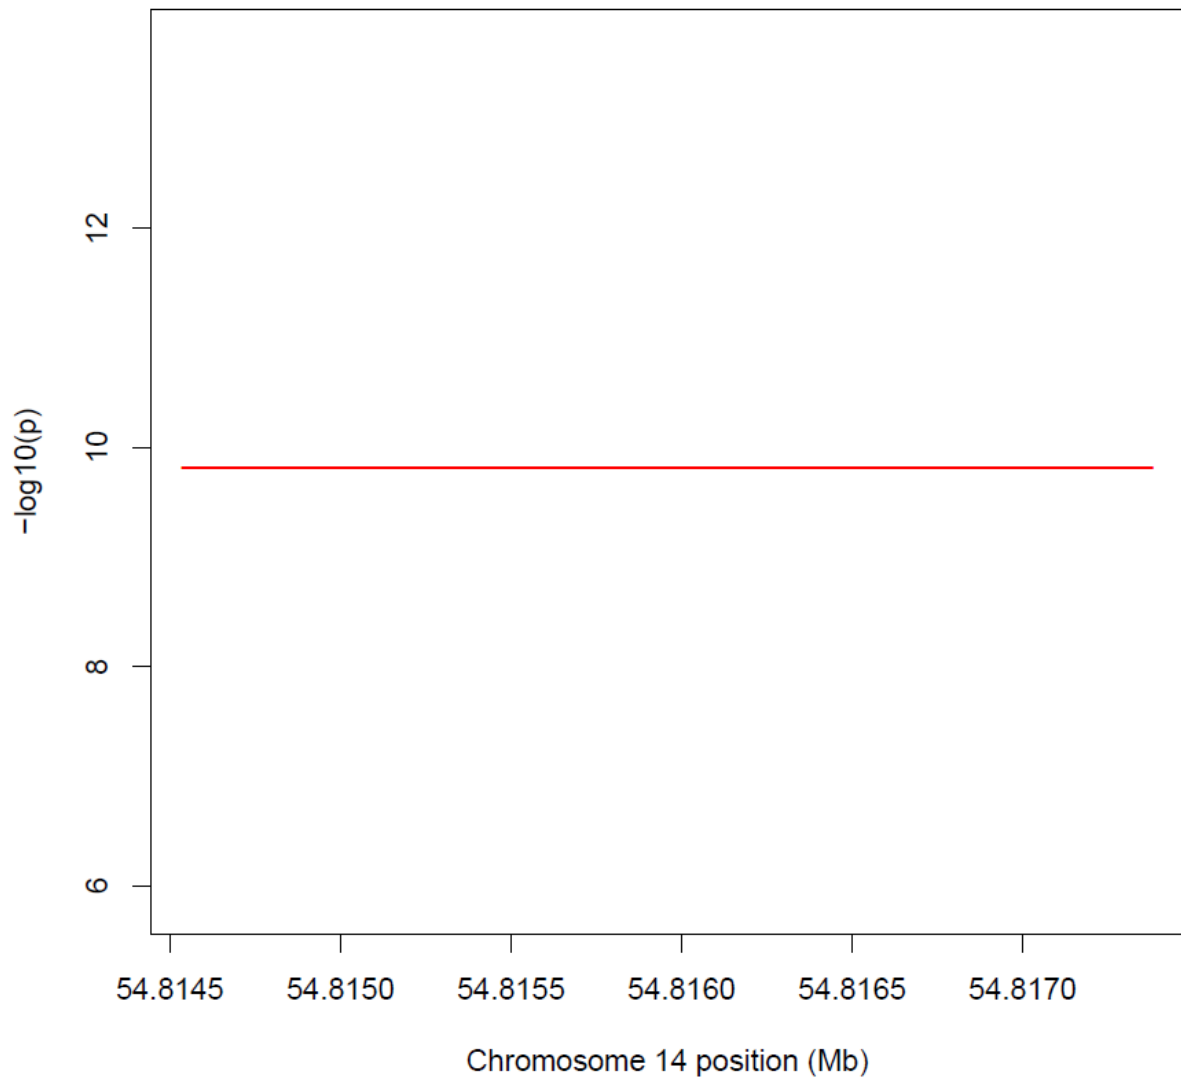

**Supplementary Figure 11** DMR identified on chromosome 14

DMR identified between t(1;11) carriers and non-carriers on chromosome 14. Chromosomal position in megabases (Mb) is shown along the X-axis while  $-\log_{10}$  p-value is shown along the Y-axis.

### Chromosome 15 DMRs

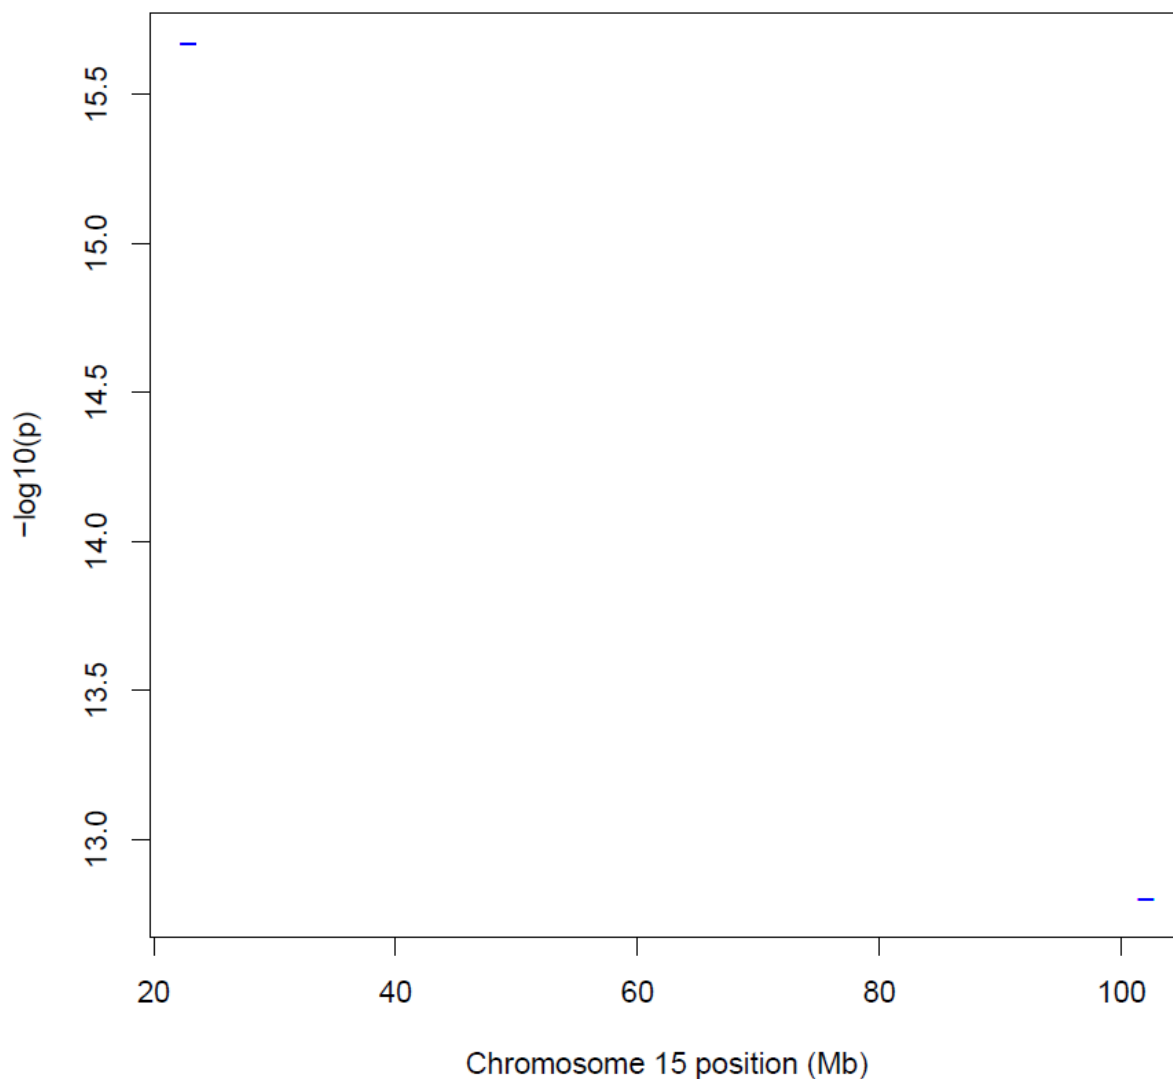

#### Supplementary Figure 12 DMRs identified on chromosome 15

DMRs identified between t(1;11) carriers and non-carriers on chromosome 15. Chromosomal position in megabases (Mb) is shown along the X-axis while  $-\log_{10}$  p-value is shown along the Y-axis.

### Chromosome 17 DMRs

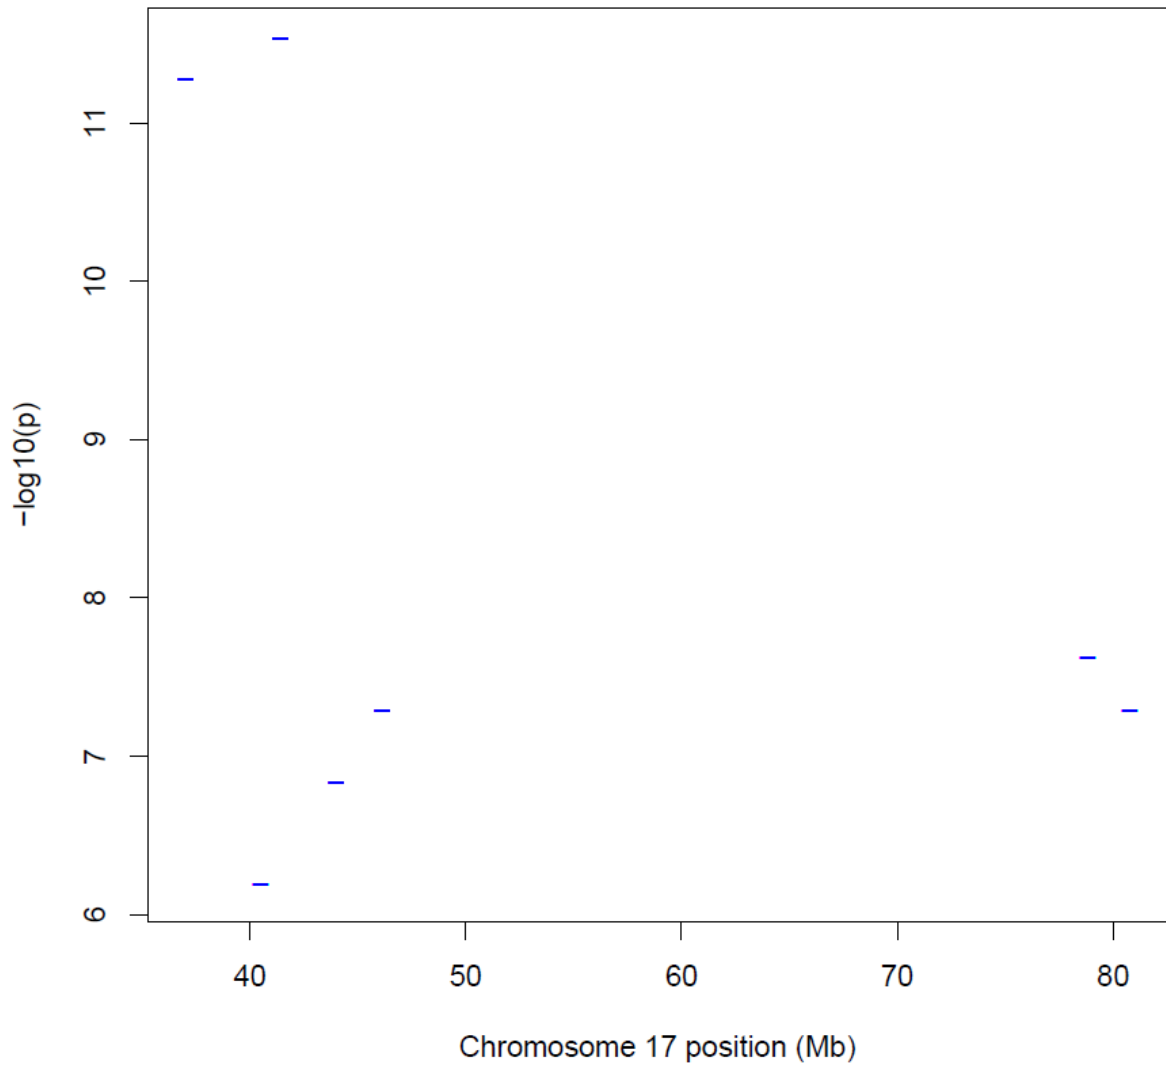

**Supplementary Figure 13** DMRs identified on chromosome 17  
DMRs identified between t(1;11) carriers and non-carriers on chromosome 17. Chromosomal position in megabases (Mb) is shown along the X-axis while  $-\log_{10}$  p-value is shown along the Y-axis.

### Chromosome 18 DMRs

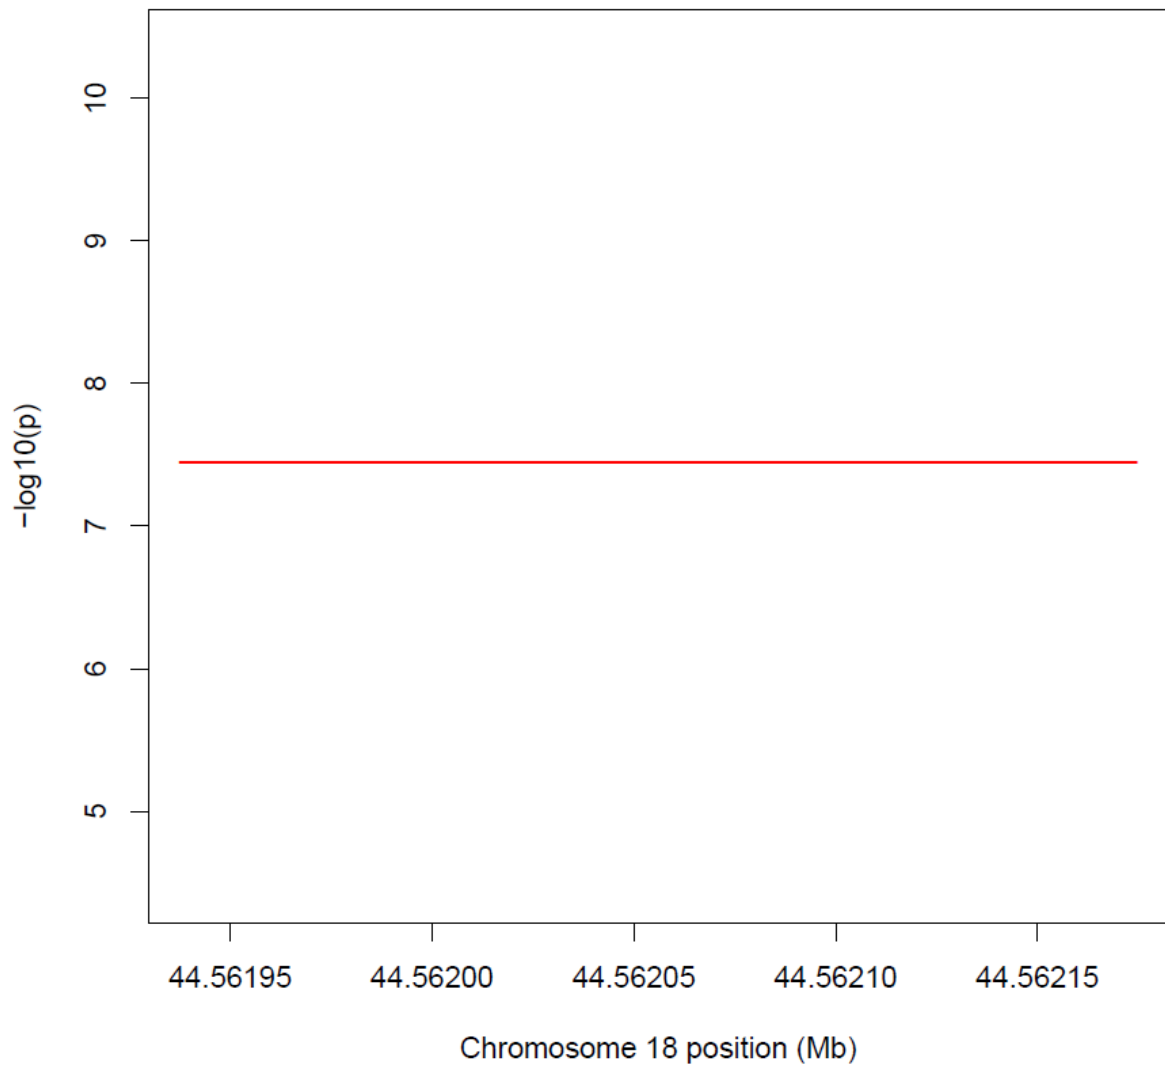

**Supplementary Figure 14** DMR identified on chromosome 18

DMR identified between t(1;11) carriers and non-carriers on chromosome 18. Chromosomal position in megabases (Mb) is shown along the X-axis while  $-\log_{10}$  p-value is shown along the Y-axis.

### Chromosome 19 DMRs

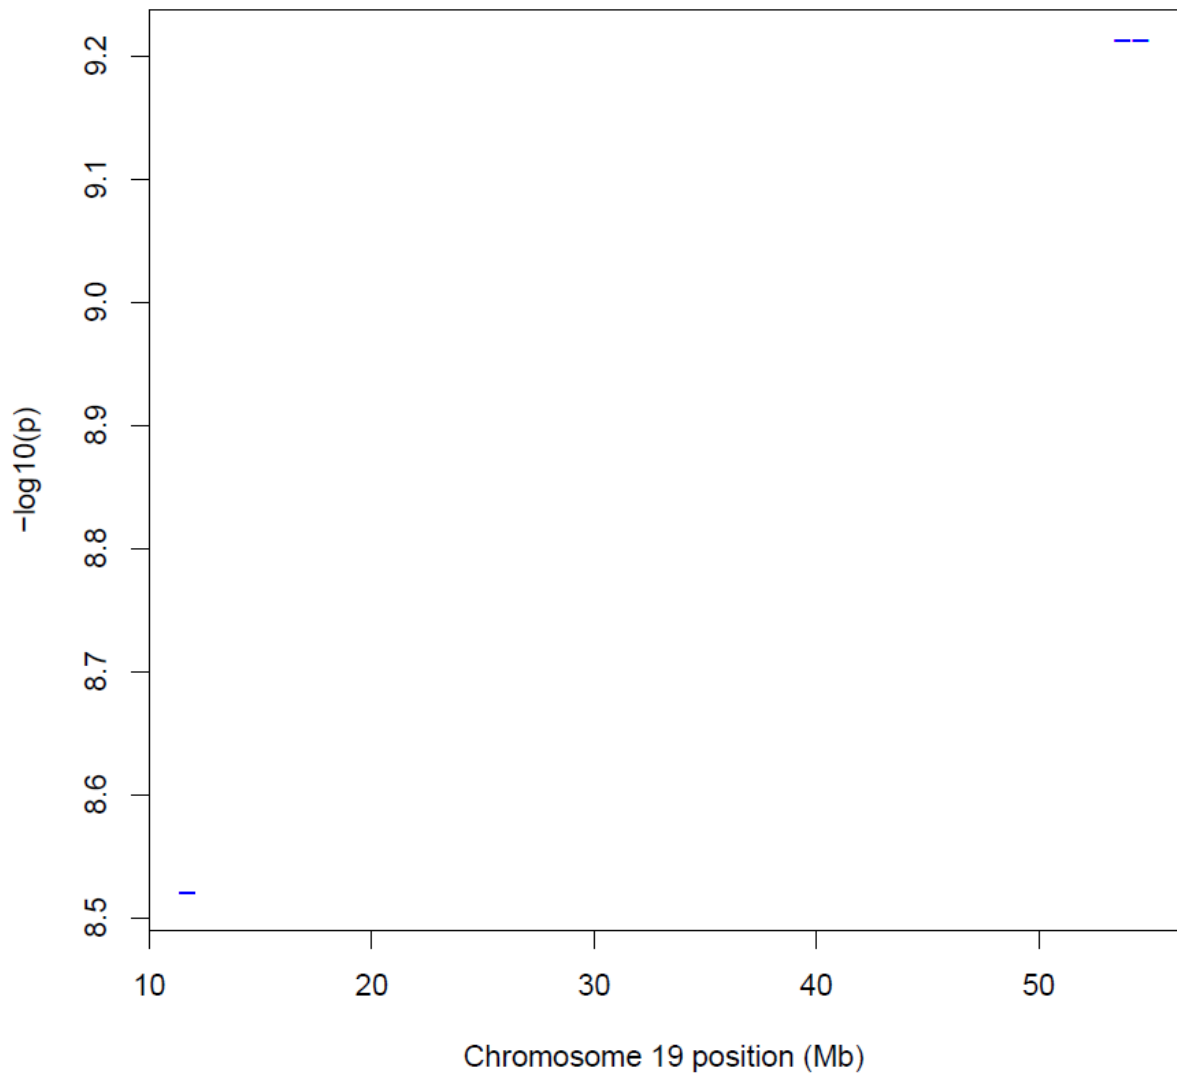

**Supplementary Figure 15** DMRs identified on chromosome 19

DMRs identified between t(1;11) carriers and non-carriers on chromosome 19. Chromosomal position in megabases (Mb) is shown along the X-axis while  $-\log_{10}$  p-value is shown along the Y-axis.

### Chromosome 20 DMRs

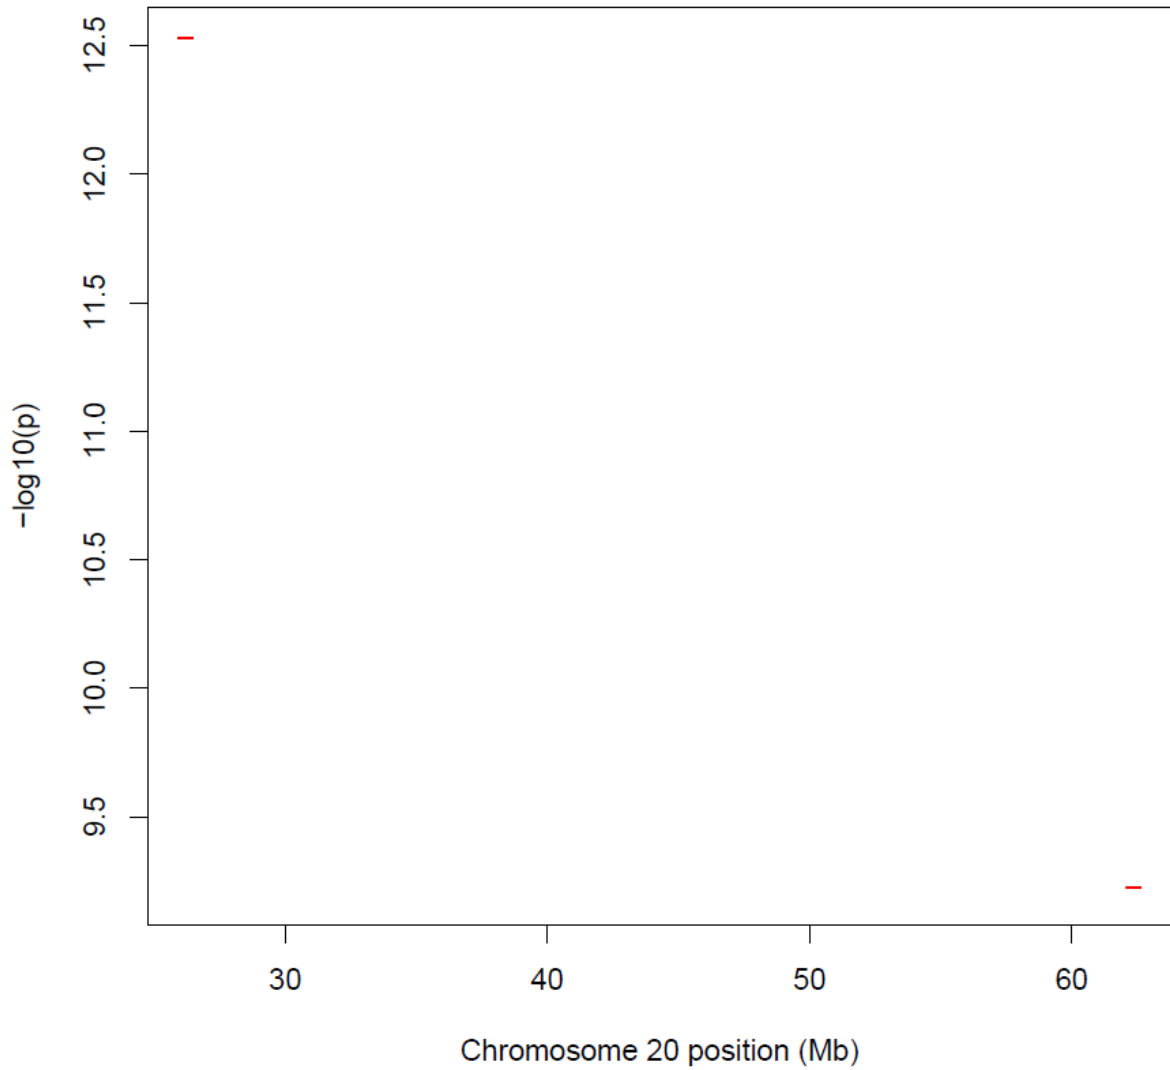

**Supplementary Figure 16** DMRs identified on chromosome 20

DMRs identified between t(1;11) carriers and non-carriers on chromosome 20. Chromosomal position in megabases (Mb) is shown along the X-axis while  $-\log_{10}$  p-value is shown along the Y-axis.



### Chromosome 22 DMRs

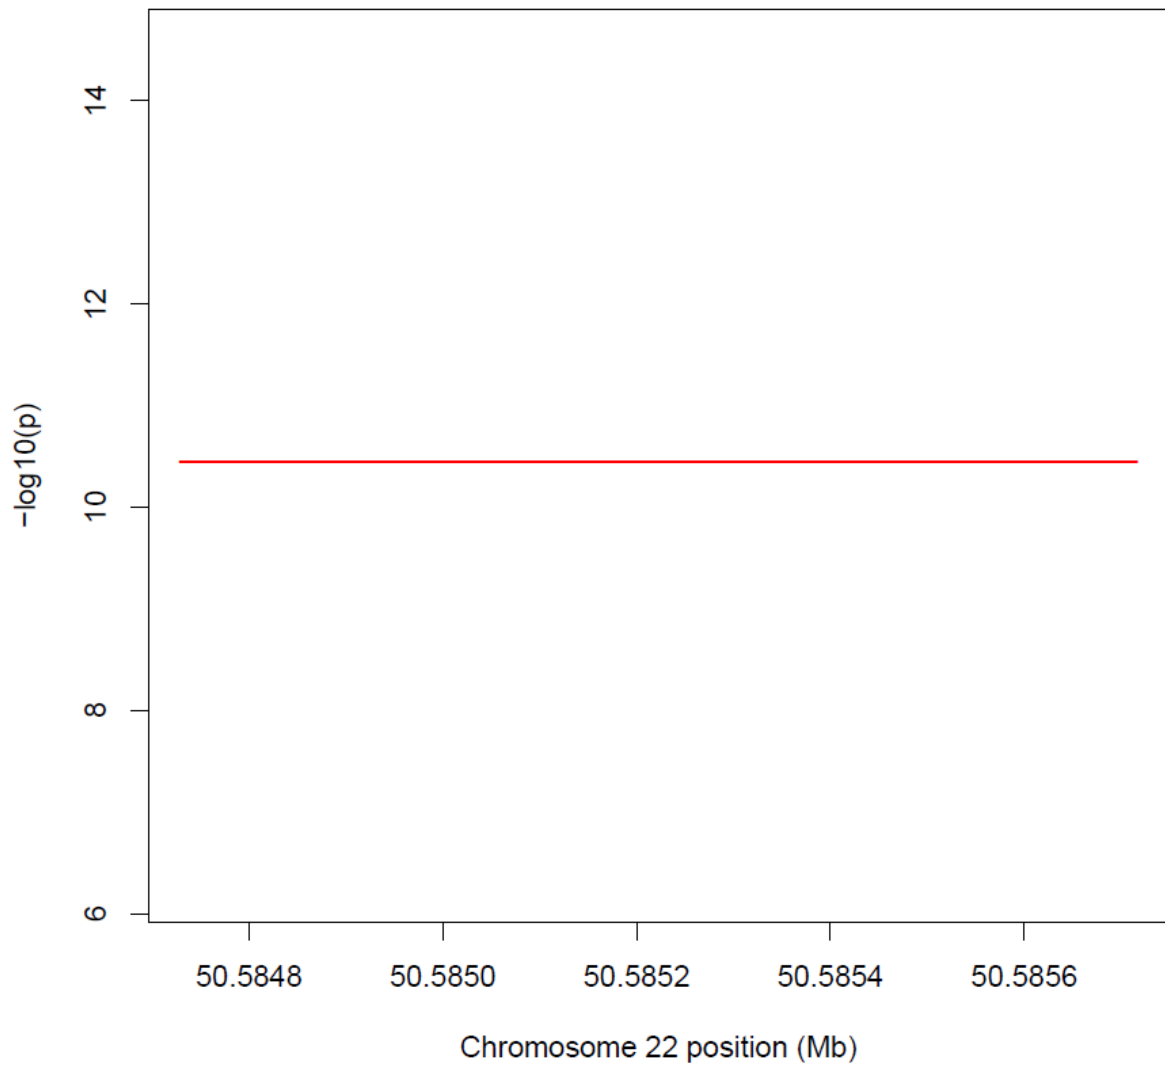

**Supplementary Figure 17** DMRs identified on chromosome 22  
DMRs identified between t(1;11) carriers and non-carriers on chromosome 22. Chromosomal position in megabases (Mb) is shown along the X-axis while  $-\log_{10}$  p-value is shown along the Y-axis.

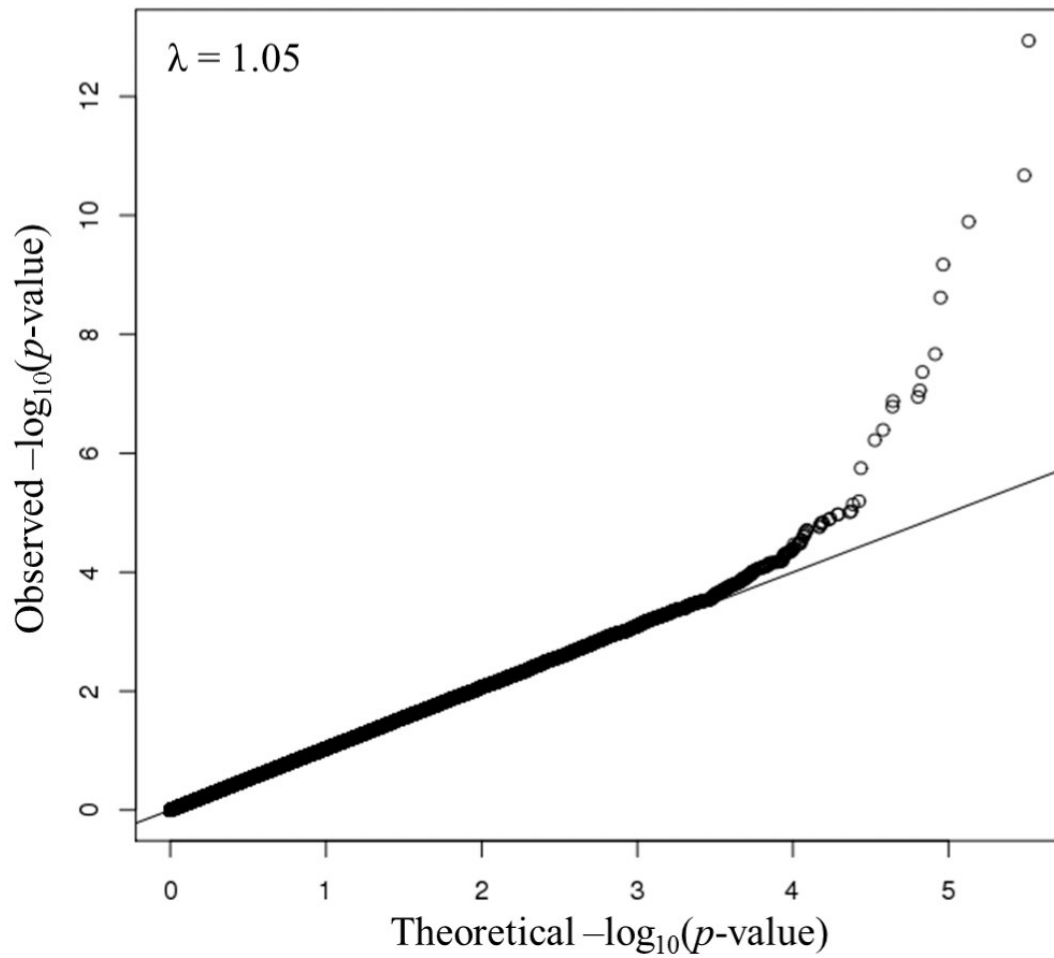

**Supplementary Figure 18** Quantile-quantile plot showing observed vs. expected  $p$ -values for differential methylation between t(1;11) carriers and non-carriers

Shown are observed raw  $-\log_{10} p$ -values (y-axis; circular points) plotted against the expected distribution of  $-\log_{10} p$ -values under the null hypothesis (x-axis; solid diagonal line). The genomic inflation factor ( $\lambda$ ) is presented in the upper-left corner of the plot.
